# Supplementary material for: Efficacy and safety of anti-PD-1 monotherapy versus anti-PD-1 antibodies plus lenvatinib in patients with advanced hepatocellular carcinoma: a real-world experience
Source: PubMed Central journal article supplement — Ther Adv Med Oncol. 2023 Oct 24;15:17588359231206274. doi: 10.1177/17588359231206274 (PMC10599113; doi:10.1177/17588359231206274), 2023-10-24
Supplement: sj-pdf-2-tam-10.1177_17588359231206274.pdf [file sj-pdf-2-tam-10.1177_17588359231206274.pdf]

**Figure S1**

**a**

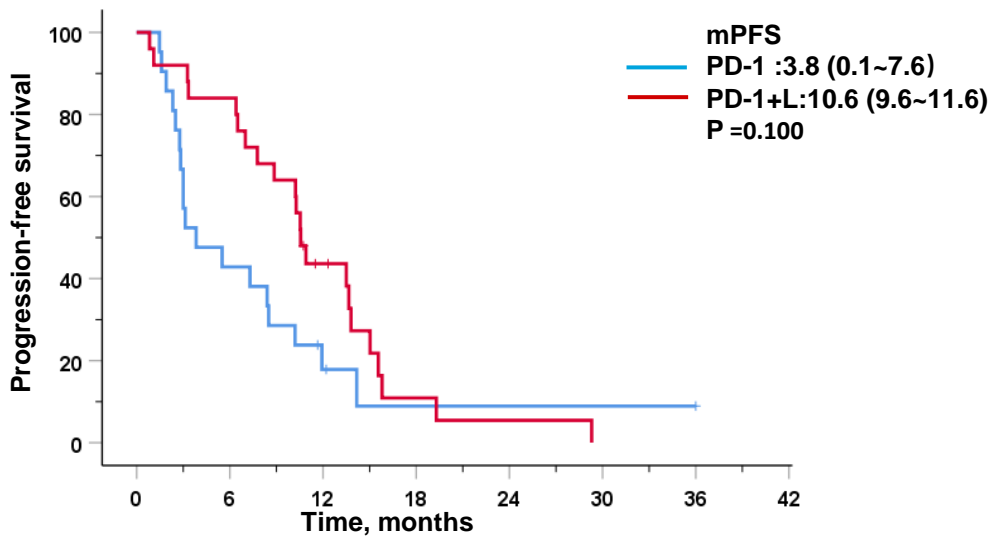

Number at risk

|         |    |    |   |   |   |   |   |   |
|---------|----|----|---|---|---|---|---|---|
| PD-1:   | 21 | 9  | 3 | 1 | 1 | 1 | 1 | 0 |
| PD-1+L: | 25 | 21 | 9 | 2 | 1 | 0 | 0 | 0 |

**b**

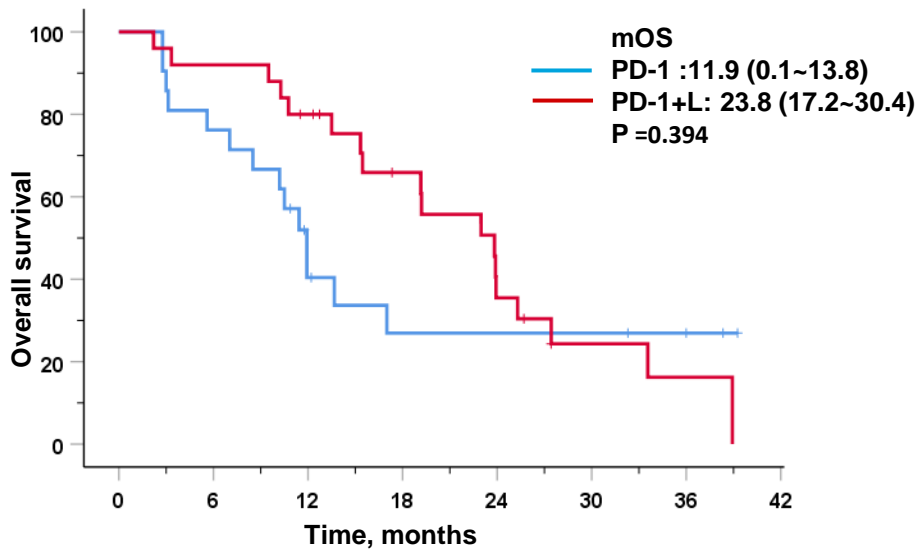

Number at risk

|         |    |    |    |    |   |   |   |   |
|---------|----|----|----|----|---|---|---|---|
| PD-1:   | 21 | 16 | 7  | 4  | 4 | 4 | 3 | 0 |
| PD-1+L: | 25 | 23 | 19 | 13 | 7 | 3 | 2 | 0 |

**Figure S1.** Kaplan–Meier curves for progression-free survival (a) and overall survival (b) after stratification by the absence of MVT.

**Figure S2**

**a**

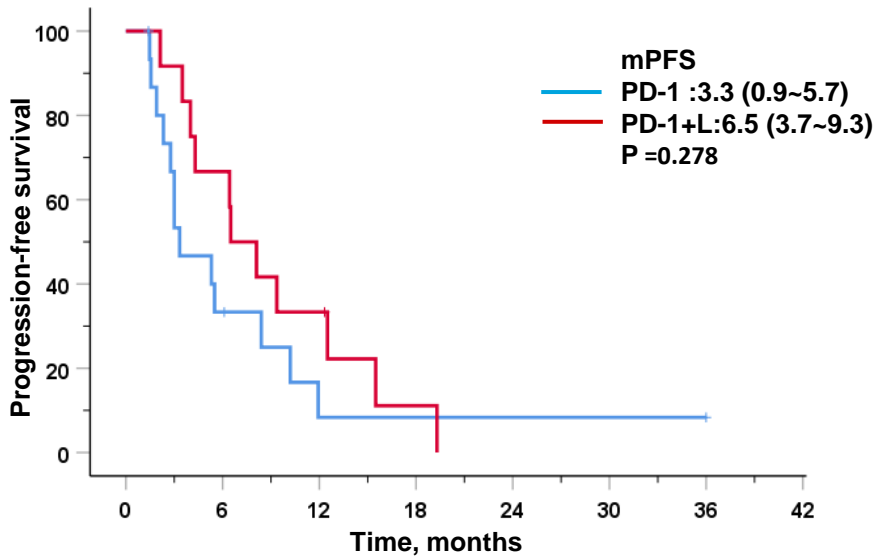

Number at risk

|         |    |   |   |   |   |   |   |   |
|---------|----|---|---|---|---|---|---|---|
| PD-1:   | 16 | 5 | 1 | 1 | 1 | 1 | 1 | 0 |
| PD-1+L: | 12 | 8 | 4 | 1 | 0 | 0 | 0 | 0 |

**b**

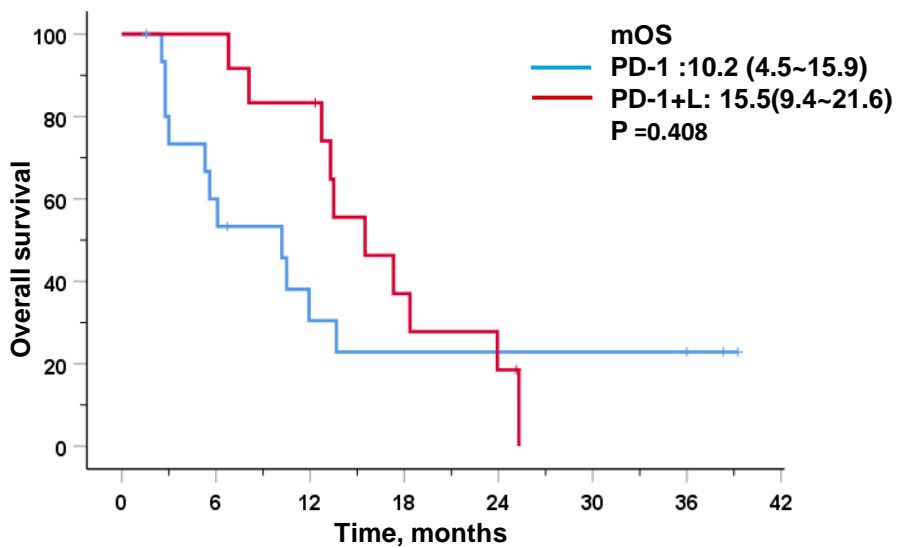

Number at risk

|         |    |    |    |   |   |   |   |   |
|---------|----|----|----|---|---|---|---|---|
| PD-1:   | 16 | 9  | 4  | 3 | 3 | 3 | 3 | 0 |
| PD-1+L: | 12 | 12 | 10 | 4 | 2 | 0 | 0 | 0 |

**Figure S2.** Kaplan–Meier curves for progression-free survival (a) and overall survival (b) after stratification by the absence of EM.
